# Supplementary material
Source: PubMed Central journal article supplement (PMC4172290)
Supplement: NIHMS619508-supplement-01.pdf [file NIHMS619508-supplement-01.pdf]

**Supplemental Material 1. Correlation between Affective Temperaments and Mood (Manic and Depressive) Symptoms**

| TEMPS-A subscales   | BD Patients             |                            | Healthy Controls        |                            |
|---------------------|-------------------------|----------------------------|-------------------------|----------------------------|
|                     | Manic Symptoms (CARS-M) | Depressive Symptoms (HRSD) | Manic Symptoms (CARS-M) | Depressive Symptoms (HRSD) |
| <i>Cyclothymia</i>  | $r=.451^{**}$           | $r=.216$                   | $r=.115$                | $r=.443^{**}$              |
| <i>Depression</i>   | $r=.297^*$              | $r=.475^{**}$              | $r=.031$                | $r=.326^{**}$              |
| <i>Hyperthymia</i>  | $r=.327^*$              | $r=.146$                   | $r=.183$                | $r=-.060$                  |
| <i>Irritability</i> | $r=.544^{**}$           | $r=.100$                   | $r=.179$                | $r=.390^{**}$              |
| <i>Anxiety</i>      | $r=.437^{**}$           | $r=.492^{**}$              | $r=.148$                | $r=.409^{**}$              |

\*  $p<.05$ ; \*\*  $p<.01$
